# Supplementary material for: Spaceflight and hind limb unloading induces an arthritic phenotype in knee articular cartilage and menisci of rodents
Source: PubMed Central journal article supplement (PMC8131644; doi:10.1038/s41598-021-90010-2), 2021-05-18

## SPACEFLIGHT AND HIND LIMB UNLOADING INDUCES AN ARTHRITIC PHENOTYPE IN KNEE ARTICULAR CARTILAGE AND MENISCI OF RODENTS

Andy T. Kwok<sup>1</sup>, Nequesha S. Mohamed<sup>2</sup>, Johannes F. Plate<sup>2</sup>, Raghunatha R. Yammani<sup>3,2</sup>, Samuel Rosas<sup>2</sup>, Ted A. Bateman<sup>4</sup>, Eric Livingston<sup>4</sup>, Joseph E. Moore<sup>1</sup>, Bethany A. Kerr<sup>5,2</sup>, Jingyun Lee<sup>3,6</sup>, Cristina M. Furdulj<sup>3,6</sup>, Li Tan<sup>3</sup>, Mary L. Bouxsein<sup>7</sup>; Virginia L. Ferguson<sup>8</sup>, Louis S. Stodieck<sup>9</sup>, David C. Zawieja<sup>10</sup>, Michael D. Delp<sup>11</sup>, Xiao W. Mao<sup>12</sup>, and Jeffrey S. Willey<sup>1,2</sup>

Departments of <sup>1</sup>Radiation Oncology, <sup>2</sup>Orthopaedic Surgery, <sup>3</sup>Internal Medicine, Section of Molecular Medicine, and <sup>5</sup>Cancer Biology, Wake Forest School of Medicine, Winston-Salem, NC, USA

<sup>4</sup>Department of Biomedical Engineering, University of North Carolina, Chapel Hill; Chapel Hill, NC, USA

<sup>6</sup>Proteomics and Metabolomics Shared Resource, Comprehensive Cancer Center, Wake Forest School of Medicine, Winston-Salem, North Carolina.

<sup>7</sup>Department of Orthopedic Surgery, Beth Israel Deaconess Medical Center, Harvard Medical School; Boston, MA, USA

<sup>8</sup>Department of Mechanical Engineering, University of Colorado at Boulder; Boulder, CO, USA

<sup>9</sup>BioServe Space Technologies, Aerospace Engineering Sciences, University of Colorado at Boulder; Boulder, CO, USA

<sup>10</sup>Department of Medical Physiology, Texas A&M University Medical School; Bryan, TX, USA

<sup>11</sup>Department of Nutrition, Food and Exercise Sciences, Florida State University; Tallahassee, FL, USA

<sup>12</sup>Division of Biomedical Engineering Sciences (BMES), Department of Basic Sciences, Loma Linda University, Loma Linda, CA, USA

**Keywords:** Rodent Research 9; STS-135; menisci; cartilage; arthritis; spaceflight; tail suspension; microgravity; sedentary; exercise

**Address correspondence to:**

**Jeffrey S. Willey**

Department of Radiation Oncology  
Wake Forest School of Medicine  
Winston-Salem, NC 27157

[jwilley@wakehealth.edu](mailto:jwilley@wakehealth.edu)

336-713-7637

# Supplemental Figure 1

## Analysis Comparison 1

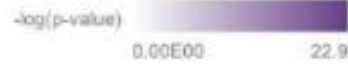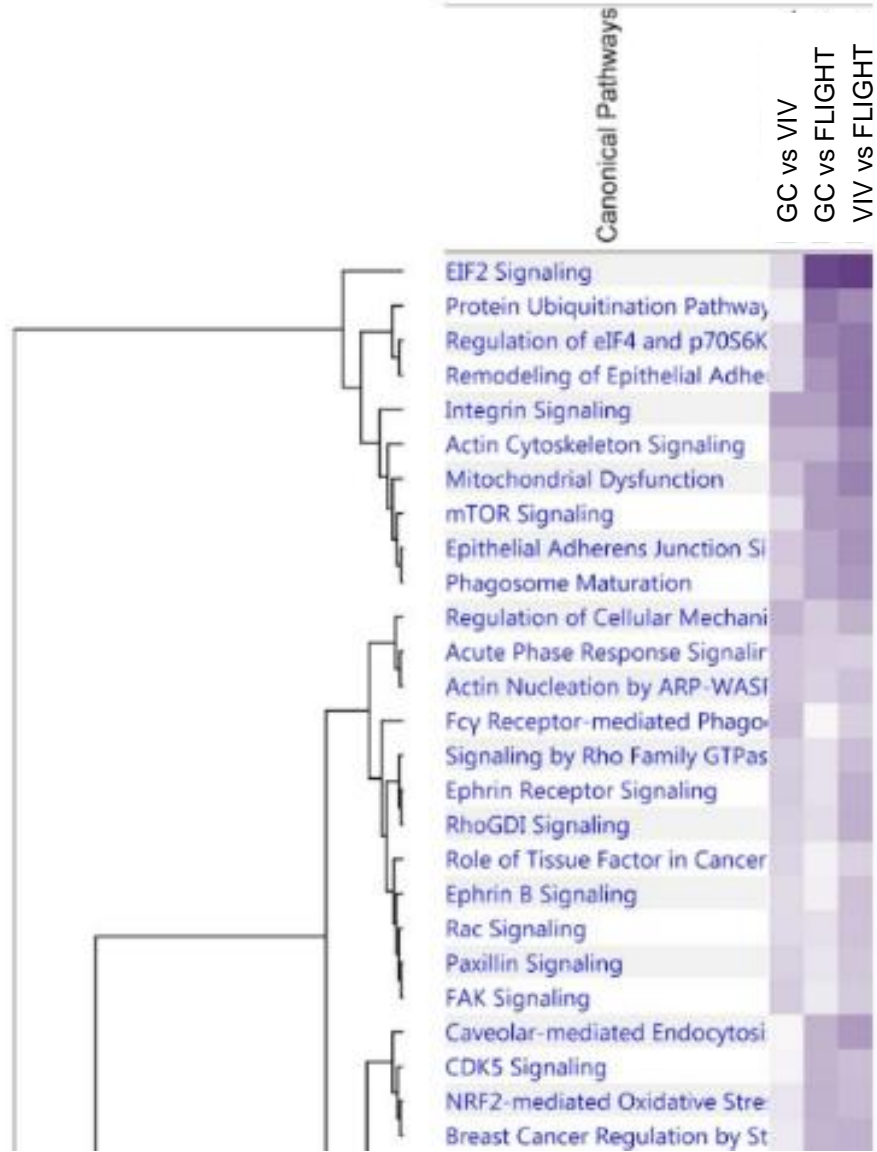

**Supplemental Figure 2**

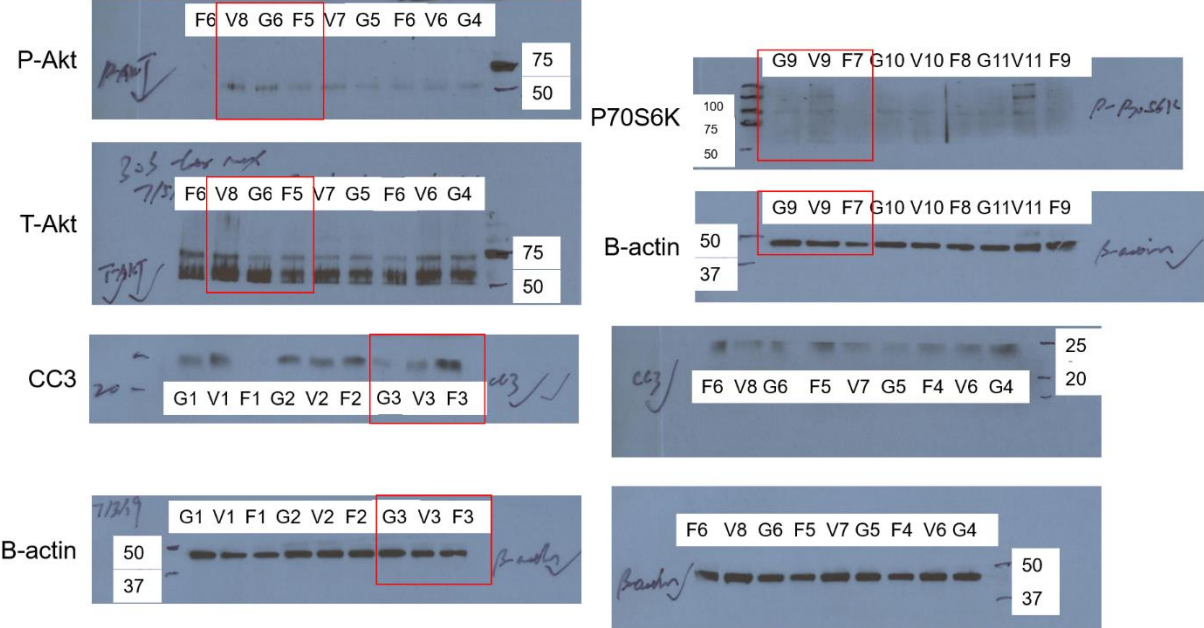

Supplement: 41598_2021_90010_MOESM1_ESM.pdf [file 41598_2021_90010_MOESM1_ESM.pdf]
